# Supplementary material for: Transient theory for scanning electrochemical microscopy of biological membrane transport: uncovering membrane–permeant interactions
Source: Analyst. 2024 Apr 19;149(11):3115–22. doi: 10.1039/d4an00411f (PMC11131039; doi:10.1039/d4an00411f)
Supplement: AN-149-D4AN00411F-s001 [file AN-149-D4AN00411F-s001.pdf]

## Supplementary Information

# **Transient Theory for Scanning Electrochemical Microscopy of Biological Membrane Transport: Uncovering Permeant–Membrane Interactions**

Siao-Han Huang, and Shigeru Amemiya\*

Department of Chemistry, University of Pittsburgh, 219 Parkman Avenue, Pittsburgh, Pennsylvania,  
15260, United States

\* To whom correspondence should be addressed. E-mail: amemiya@pitt.edu. Fax: 412-624-8611.

### **Contents:**

1. Transport model
2. Finite element simulation

**Transport Model.** We derived a Langmuir-type model for the reversible membrane transport of molecules and ions by modifying the Michaelis-Menten model of unidirectional membrane transport. With the Michaelis-Menten model, a permeant associated with a membrane component reversibly in the first step but is transported uni-directionally in the second step from the top phase ( $w_1$  in Fig. 1) to the bottom phase ( $w_2$ ) as given by

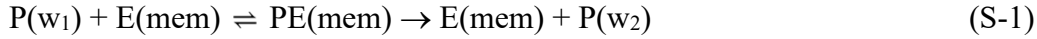

The respective rates are given by

$$v_{1,1 \rightarrow 2} = k_{\text{on}} c_{1,S} (\Gamma_S - \Gamma_{PE}) - k_{\text{off}} \Gamma_{PE} \quad (\text{S-2})$$

$$v_{2,1 \rightarrow 2} = k_{\text{cat}} \Gamma_{PE} \quad (\text{S-3})$$

where  $k_{\text{on}}$ ,  $k_{\text{off}}$ , and  $k_{\text{cat}}$  are the corresponding rate constants. Since  $v_{1,MM} = v_{2,MM}$  under steady states, the steady-state rate,  $v_{ss,1 \rightarrow 2}$ , is given by the familiar Michaelis–Menten expression as

$$v_{ss,1 \rightarrow 2} = \frac{V_{\text{max}} c_{1,S}}{c_{1,S} + K_M} \quad (\text{S-4})$$

with

$$V_{\text{max}} = k_{\text{cat}} \Gamma_S \quad (\text{S-5})$$

$$K_M = \frac{k_{\text{off}} + k_{\text{cat}}}{k_{\text{on}}} \quad (\text{S-6})$$

Eqs S-5 and S-6 indicate that  $V_{\text{max}}$  and  $K_M$  are the convolutions of a few parameters, which can not be resolved under steady states. In addition, we also consider the reverse direction of membrane transport from the bottom phase ( $w_2$  in Fig. 1) to the top phase ( $w_1$ ) as

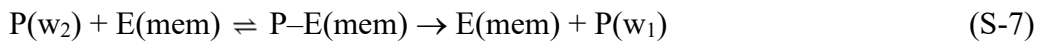

Both directions are considered to modify eqs S-2 and S-3 as

$$v_{1,MM} = k_{\text{on}} c_{1,S} (\Gamma_S - \Gamma_{PE}) - k_{\text{off}} \Gamma_{PE} - k_{\text{cat}} \Gamma_{PE} \quad (\text{S-8})$$

$$v_{2,MM} = k_{cat}\Gamma_{PE} - k_{on}c_{2,S}(\Gamma_S - \Gamma_{PE}) + k_{off}\Gamma_{PE} \quad (S-9)$$

With  $k_{ass} = k_{on}$  and  $k_{diss} = k_{off} + k_{cat}$ , eqs S-8 and S-9 are equivalent to eqs 2 and 3 of the Langmuir-type model.

**Finite Element Simulation.** The current response of a disk-shaped tip in the SECM configuration was simulated by solving an axisymmetric (2D) diffusion problem as defined in a cylindrical coordinate (Fig. 2). We employed COMSOL Multiphysics (version 6.2, COMSOL, Inc., Burlington, MA) to solve the 2D SECM diffusion problem in dimensionless form. The details of the simulation are summarized in the report generated by COMSOL (see below). Study 1 simulates the steady-state tip current at various tip–membrane distances to yield an approach curve. Study 2 simulates the transient tip current at various times to yield a chronoamperogram at a fixed tip–membrane distance.

The dimensionless equations are defined as follows. Eqs 11 and 12 for the diffusion of permeants were defined by dimensionless parameters as

$$\frac{\partial C_1}{\partial \tau} = \frac{\partial^2 C_1}{\partial R^2} + \frac{1}{R} \frac{\partial C_1}{\partial R} + \frac{\partial^2 C_1}{\partial Z^2} \quad (S-10)$$

$$\frac{\partial C_2}{\partial \tau} = \frac{\partial^2 C_2}{\partial R^2} + \frac{1}{R} \frac{\partial C_2}{\partial R} + \frac{\partial^2 C_2}{\partial Z^2} \quad (S-11)$$

where

$$C_1 = \frac{c_1}{c_0} \quad (S-12)$$

$$C_2 = \frac{c_2}{c_0} \quad (S-13)$$

$$\tau = \frac{Dt}{a^2} \quad (S-14)$$

$$R = \frac{r}{a} \quad (S-15)$$

$$Z = \frac{z}{a} \quad (\text{S-16})$$

In addition, geometric parameters were defined by using dimensionless parameters as

$$L = \frac{d}{a} \quad (\text{S-17})$$

This problem was solved numerically to calculate the normalized tip current,  $i_T/i_{T,\infty}$ , which was set to 1 at  $L = 25$ .

Boundary conditions for the permeant at the membrane (eqs 13–15) were also defined by using dimensionless parameters as

$$\frac{\partial C_1}{\partial Z} = \kappa \lambda \left[ \rho C_1 (1 - \theta_{\text{PE}}) - \theta_{\text{PE}} \right] \quad (\text{S-18})$$

$$\frac{\partial C_2}{\partial Z} = \kappa \lambda \left[ \rho C_2 (1 - \theta_{\text{PE}}) - \theta_{\text{PE}} \right] \quad (\text{S-19})$$

$$\frac{\partial \theta_{\text{PE}}}{\partial \tau} = \lambda \left[ \rho (C_1 + C_2) (1 - \theta_{\text{PE}}) - 2\theta_{\text{PE}} \right] \quad (\text{S-20})$$

where  $\lambda$ ,  $\rho$ , and  $\kappa$  are given by eqs 17–19, respectively.

Report date

Apr 11, 2024, 12:51:57 PM

Contents

- 1. [Global Definitions](#)
  - 1.1. [Parameters](#)
- 2. [Component 1](#)
  - 2.1. [Definitions](#)
  - 2.2. [Geometry 1](#)
  - 2.3. [Transport of Diluted Species](#)
  - 2.4. [Transport of Diluted Species 2](#)
  - 2.5. [General Form Boundary PDE](#)
  - 2.6. [Mesh 1](#)
- 3. [Study 1](#)
  - 3.1. [Parametric Sweep](#)
  - 3.2. [Stationary](#)
- 4. [Study 2](#)
  - 4.1. [Time Dependent](#)
- 5. [Results](#)
  - 5.1. [Data Sets](#)
  - 5.2. [Derived Values](#)
  - 5.3. [Tables](#)
  - 5.4. [Plot Groups](#)

1. Global Definitions

|      |                           |
|------|---------------------------|
| Date | Apr 11, 2024, 11:01:01 AM |
|------|---------------------------|

Global settings

|         |                                             |
|---------|---------------------------------------------|
| Name    | Transient SECM of Membrane Transport.mph    |
| Path    | E:\Transient SECM of Membrane Transport.mph |
| Version | COMSOL Multiphysics 6.2 (Build: 339)        |

Used products

|                     |
|---------------------|
| COMSOL Multiphysics |
|---------------------|

Computer information

|                  |                                                               |
|------------------|---------------------------------------------------------------|
| CPU              | Intel64 Family 6 Model 158 Stepping 13, 8 cores, 15.79 GB RAM |
| Operating system | Windows 10                                                    |

1.1. Parameters

Parameters 1

| Name | Expression | Value | Description |
|------|------------|-------|-------------|
|------|------------|-------|-------------|

|       |             |           |                                                   |
|-------|-------------|-----------|---------------------------------------------------|
| lamda | 0.1 [m/s]   | 0.1 m/s   | normalized rate constant                          |
| rho   | 1           | 1         |                                                   |
| kappa | 10          | 10        |                                                   |
| L     | 0.1 [m]     | 0.1 m     | normalized tip-membrane distance                  |
| RG    | 1.4[m]      | 1.4 m     | normalized tip outer radius                       |
| c0    | 1 [mol/m^3] | 1 mol/m^3 |                                                   |
| Dg    | 0 [m^2/s]   | 0 m^2/s   | diffusion coefficient of permeant on the membrane |

## 2. Component 1

| Settings                                                    |       |
|-------------------------------------------------------------|-------|
| Description                                                 | Value |
| Avoid inverted elements by curving interior domain elements | Off   |

### 2.1. Definitions

#### 2.1.1. Variables

##### Variables 1

| Selection              |                                                                           |                                       |             |
|------------------------|---------------------------------------------------------------------------|---------------------------------------|-------------|
| Geometric entity level |                                                                           | Entire model                          |             |
| Name                   | Expression                                                                | Unit                                  | Description |
| V1                     | $\kappa \cdot \lambda \cdot (\rho \cdot c_1 \cdot (1 - u) - c_0 \cdot u)$ | mol <sup>2</sup> /(m <sup>4</sup> ·s) |             |
| V2                     | $\kappa \cdot \lambda \cdot (\rho \cdot c_2 \cdot (1 - u) - c_0 \cdot u)$ | mol <sup>2</sup> /(m <sup>4</sup> ·s) |             |

#### 2.1.2. Probes

##### Boundary Probe 1

|                        |                                         |
|------------------------|-----------------------------------------|
| Probe type             | Boundary probe                          |
| Selection              |                                         |
| Geometric entity level | Boundary                                |
| Selection              | Geometry geom1: Dimension 1: Boundary 5 |

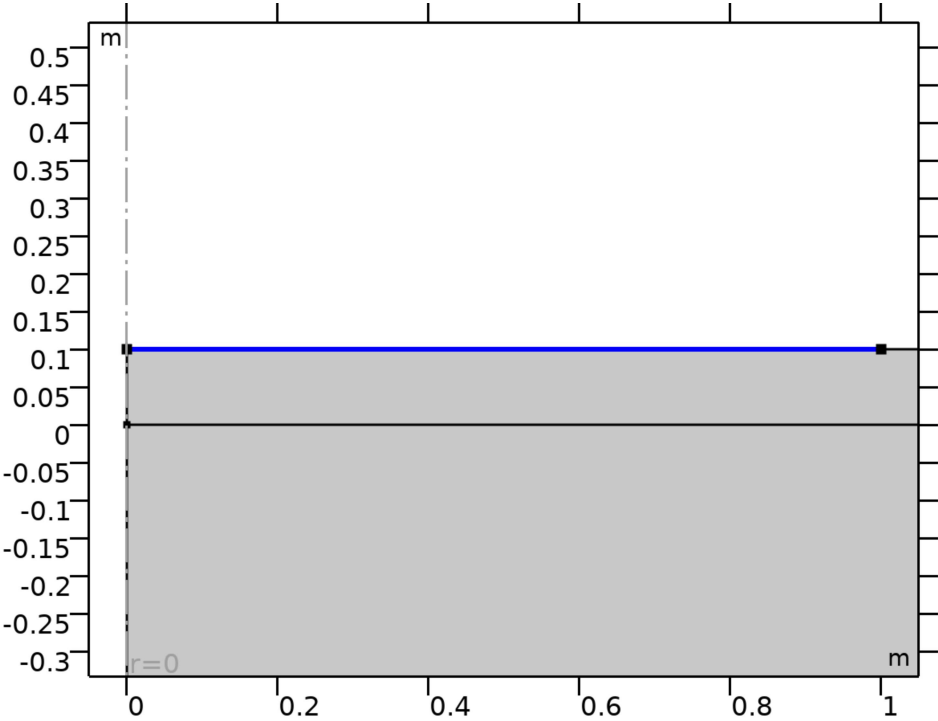

*Selection*

**2.1.3. Nonlocal Couplings**

**Integration 1**

|               |             |
|---------------|-------------|
| Coupling type | Integration |
| Operator name | intop1      |

Selection

|                        |                                         |
|------------------------|-----------------------------------------|
| Geometric entity level | Boundary                                |
| Selection              | Geometry geom1: Dimension 1: Boundary 5 |

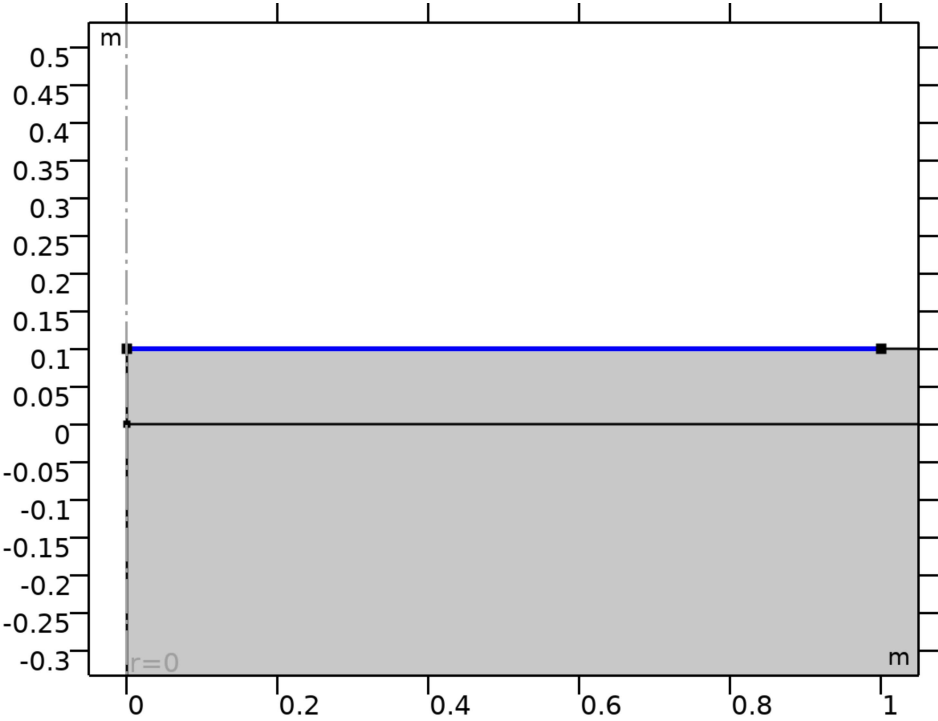

*Selection*

**2.1.4. Coordinate Systems**

**Boundary System 1**

|                        |                 |
|------------------------|-----------------|
| Coordinate system type | Boundary system |
| Tag                    | sys1            |

Coordinate names

| First | Second | Third |
|-------|--------|-------|
| t1    | to     | n     |

**2.2. Geometry 1**

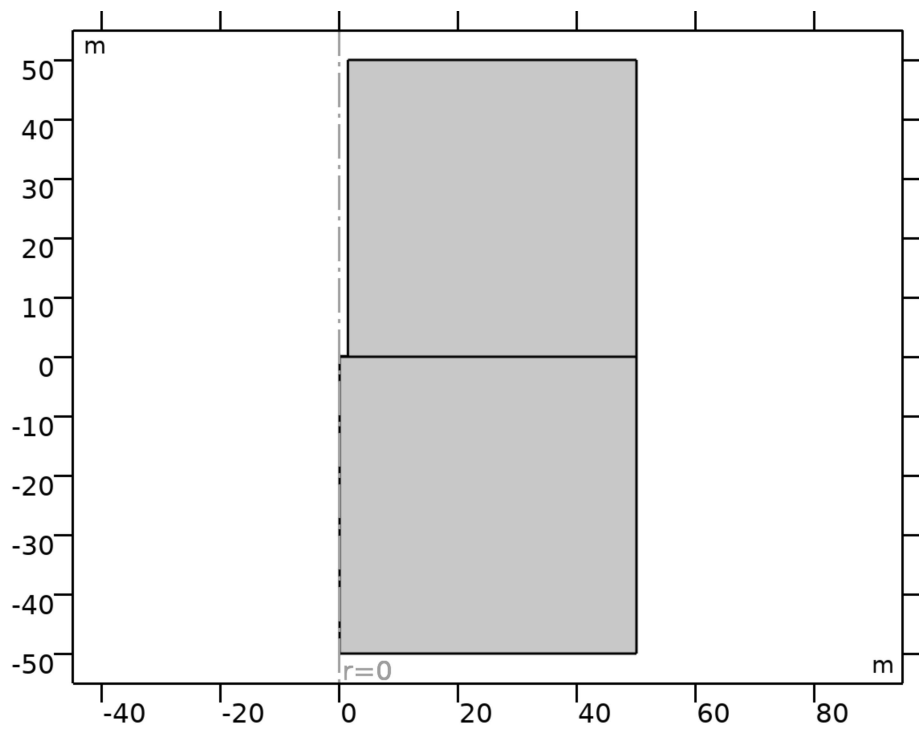

*Geometry 1*

| Units        |     |
|--------------|-----|
| Length unit  | m   |
| Angular unit | deg |

## 2.3. Transport of Diluted Species

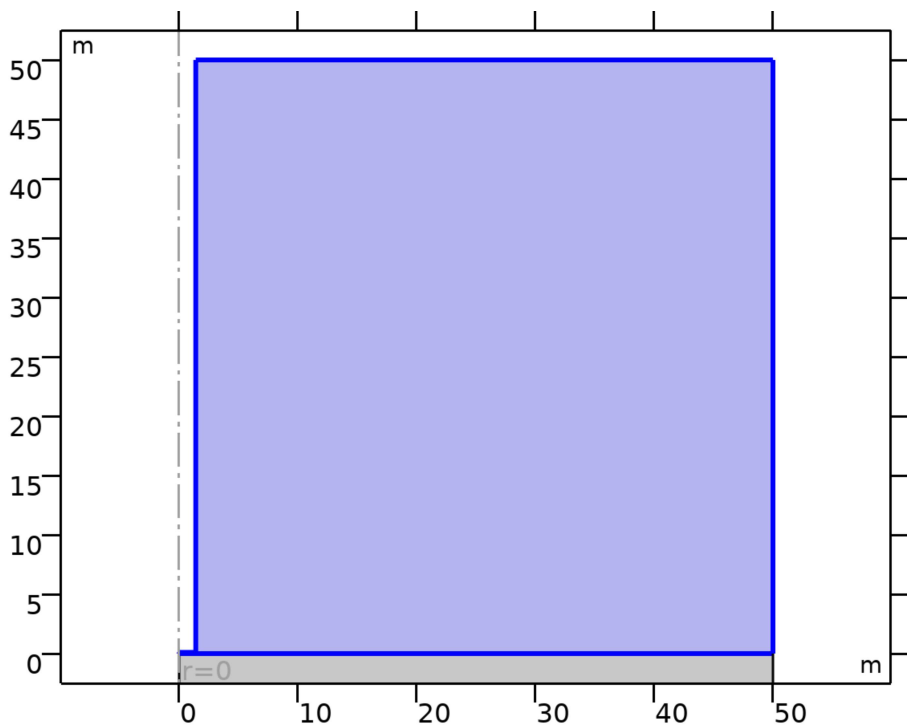

*Transport of Diluted Species*

Equations

$$\nabla \cdot \mathbf{J}_i + \mathbf{u} \cdot \nabla C_i = R_i$$

$$\mathbf{J}_i = -D_i \nabla C_i$$

| Features               |          |
|------------------------|----------|
| Transport Properties 1 | Domain   |
| Axial Symmetry 1       | Boundary |
| No Flux 1              | Boundary |
| Initial Values 1       | Domain   |
| Concentration 1        | Boundary |
| Concentration 2        | Boundary |
| Flux 1                 | Boundary |

2.4. Transport of Diluted Species 2

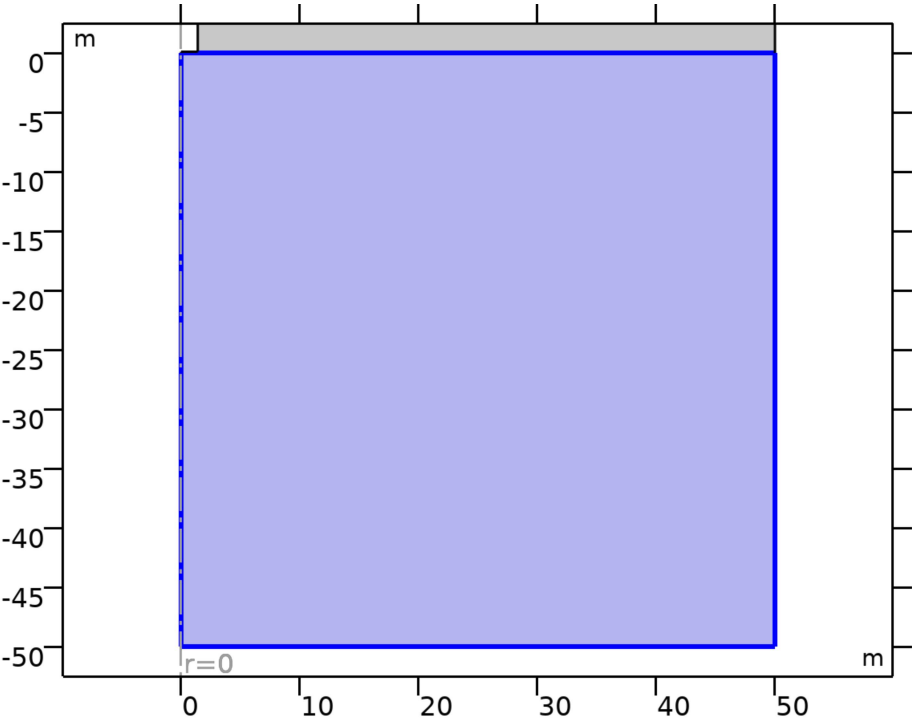

Transport of Diluted Species 2

Equations

$$\nabla \cdot \mathbf{J}_i + \mathbf{u} \cdot \nabla C_i = R_i$$

$$\mathbf{J}_i = -D_i \nabla C_i$$

| Features               |          |
|------------------------|----------|
| Transport Properties 1 | Domain   |
| Axial Symmetry 1       | Boundary |
| No Flux 1              | Boundary |
| Initial Values 1       | Domain   |
| Concentration 1        | Boundary |

|        |          |
|--------|----------|
| Flux 1 | Boundary |
|--------|----------|

## 2.5. General Form Boundary PDE

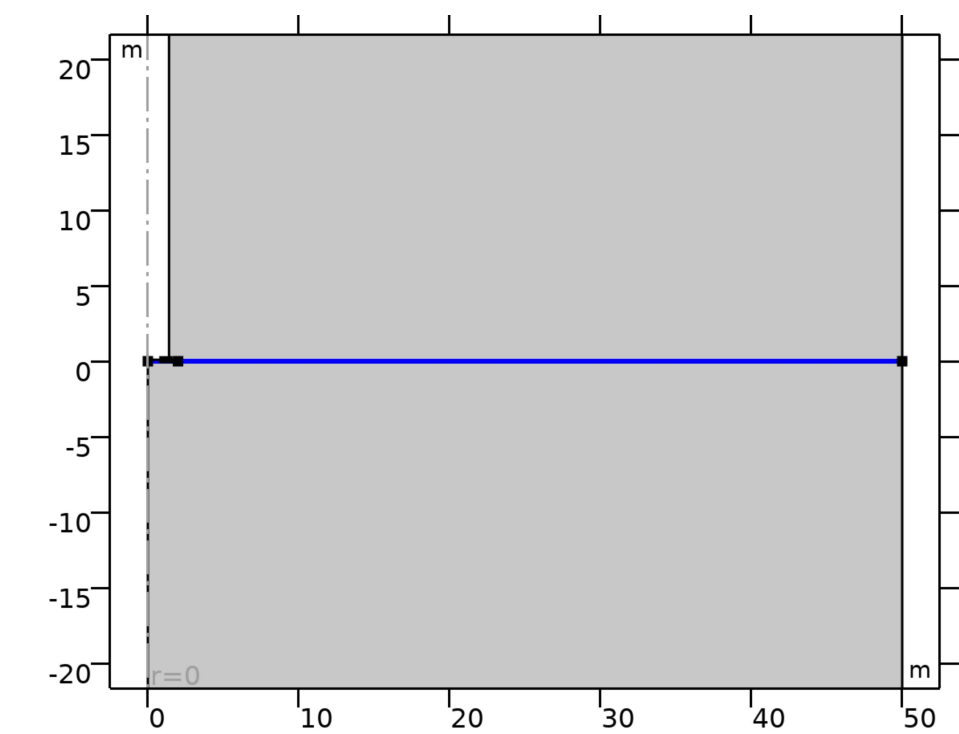

*General Form Boundary PDE*

Equations

$$\nabla_T \cdot \Gamma = f$$

$$\nabla_T = (\mathbf{I} - \mathbf{n}\mathbf{n}^T) [\frac{\partial}{\partial r}, \frac{\partial}{\partial z}]$$

| Features           |          |
|--------------------|----------|
| Name               | Level    |
| General Form PDE 1 | Boundary |
| Initial Values 1   | Boundary |

## 2.6. Mesh 1

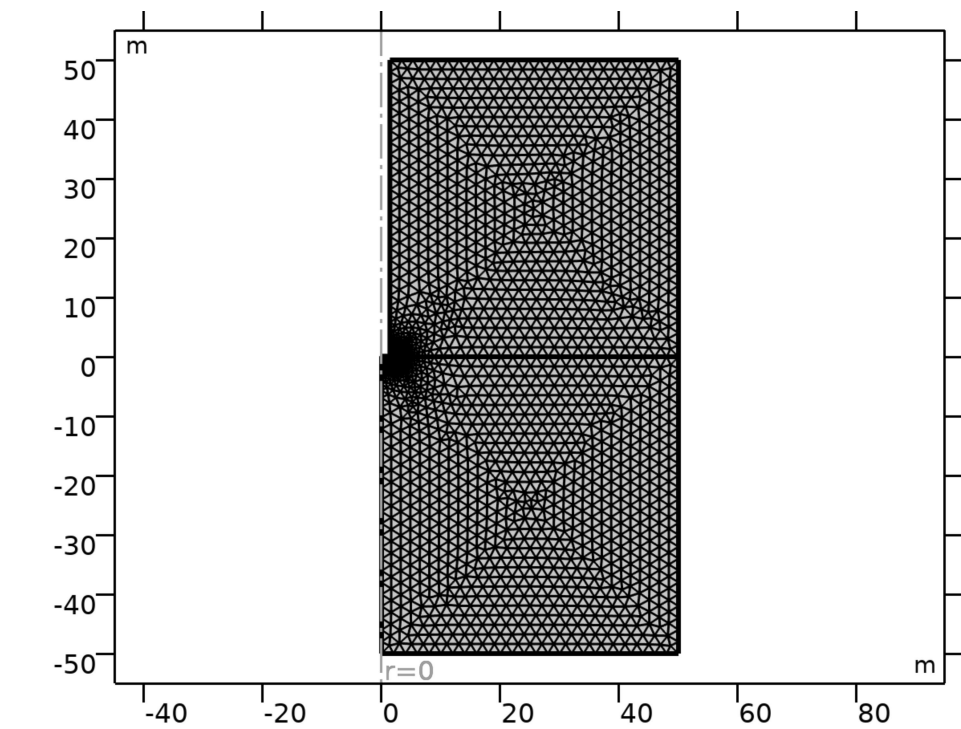

Mesh 1

### 3. Study 1

|                         |            |
|-------------------------|------------|
| Computation information |            |
| Computation time        | 2 min 33 s |

#### 3.1. Parametric Sweep

| Parameter name | Parameter value list | Parameter unit |
|----------------|----------------------|----------------|
| L              | range(10,-0.1,0.1)   | m              |

| Study settings |                        |
|----------------|------------------------|
| Description    | Value                  |
| Sweep type     | Specified combinations |
| Parameter name | L                      |
| Unit           | m                      |

| Parameters                           |                      |                |
|--------------------------------------|----------------------|----------------|
| Parameter name                       | Parameter value list | Parameter unit |
| L (normalized tip-membrane distance) | range(10,-0.1,0.1)   | m              |

#### 3.2. Stationary

| Study settings                 |       |
|--------------------------------|-------|
| Description                    | Value |
| Include geometric nonlinearity | Off   |

Physics and variables selection

| Physics interface                     | Solve for | Equation form          |
|---------------------------------------|-----------|------------------------|
| Transport of Diluted Species (tds)    | On        | Automatic (Stationary) |
| Transport of Diluted Species 2 (tds2) | On        | Automatic (Stationary) |
| General Form Boundary PDE (gb)        | On        | Automatic (Stationary) |

Store in output

| Interface                             | Output             | Selection |
|---------------------------------------|--------------------|-----------|
| Transport of Diluted Species (tds)    | Physics controlled |           |
| Transport of Diluted Species 2 (tds2) | Physics controlled |           |
| General Form Boundary PDE (gb)        | Physics controlled |           |

Mesh selection

| Component   | Mesh   |
|-------------|--------|
| Component 1 | Mesh 1 |

## 4. Study 2

Computation  
information

|                  |      |
|------------------|------|
| Computation time | 11 s |
|------------------|------|

### 4.1. Time Dependent

| Times           | Unit |
|-----------------|------|
| range(0,0.1,10) | s    |

Study settings

| Description                    | Value |
|--------------------------------|-------|
| Include geometric nonlinearity | Off   |

Study settings

| Description  | Value                                                                                                                                                                                                                                                                                                                                                                                                                                                                                                |
|--------------|------------------------------------------------------------------------------------------------------------------------------------------------------------------------------------------------------------------------------------------------------------------------------------------------------------------------------------------------------------------------------------------------------------------------------------------------------------------------------------------------------|
| Output times | {0, 0.1, 0.2, 0.3, 0.4, 0.5, 0.6, 0.7, 0.8, 0.9, 1, 1.1, 1.2, 1.3, 1.4, 1.5, 1.6, 1.7, 1.8, 1.9, 2, 2.1, 2.2, 2.3, 2.4, 2.5, 2.6, 2.7, 2.8, 2.9, 3, 3.1, 3.2, 3.3, 3.4, 3.5, 3.6, 3.7, 3.8, 3.9, 4, 4.1, 4.2, 4.3, 4.4, 4.5, 4.6, 4.7, 4.8, 4.9, 5, 5.1, 5.2, 5.3, 5.4, 5.5, 5.6, 5.7, 5.8, 5.9, 6, 6.1, 6.2, 6.3, 6.4, 6.5, 6.6, 6.7, 6.8, 6.9, 7, 7.1, 7.2, 7.3, 7.4, 7.5, 7.6, 7.7, 7.8, 7.9, 8, 8.1, 8.2, 8.3, 8.4, 8.5, 8.6, 8.7, 8.8, 8.9, 9, 9.1, 9.2, 9.3, 9.4, 9.5, 9.6, 9.7, 9.8, 9.9, 10} |

Physics and variables selection

| Physics interface                     | Solve for | Equation form              |
|---------------------------------------|-----------|----------------------------|
| Transport of Diluted Species (tds)    | On        | Automatic (Time dependent) |
| Transport of Diluted Species 2 (tds2) | On        | Automatic (Time dependent) |
| General Form Boundary PDE (gb)        | On        | Automatic (Time domain)    |

Store in output

| Interface                             | Output             | Selection |
|---------------------------------------|--------------------|-----------|
| Transport of Diluted Species (tds)    | Physics controlled |           |
| Transport of Diluted Species 2 (tds2) | Physics controlled |           |
| General Form Boundary PDE (gb)        | Physics controlled |           |

Mesh selection

| Component   | Mesh   |
|-------------|--------|
| Component 1 | Mesh 1 |

5. Results

5.1. Data Sets

5.1.1. Study 1/Solution 1

Solution

| Description | Value               |
|-------------|---------------------|
| Solution    | Solution 1 (sol1)   |
| Component   | Component 1 (comp1) |

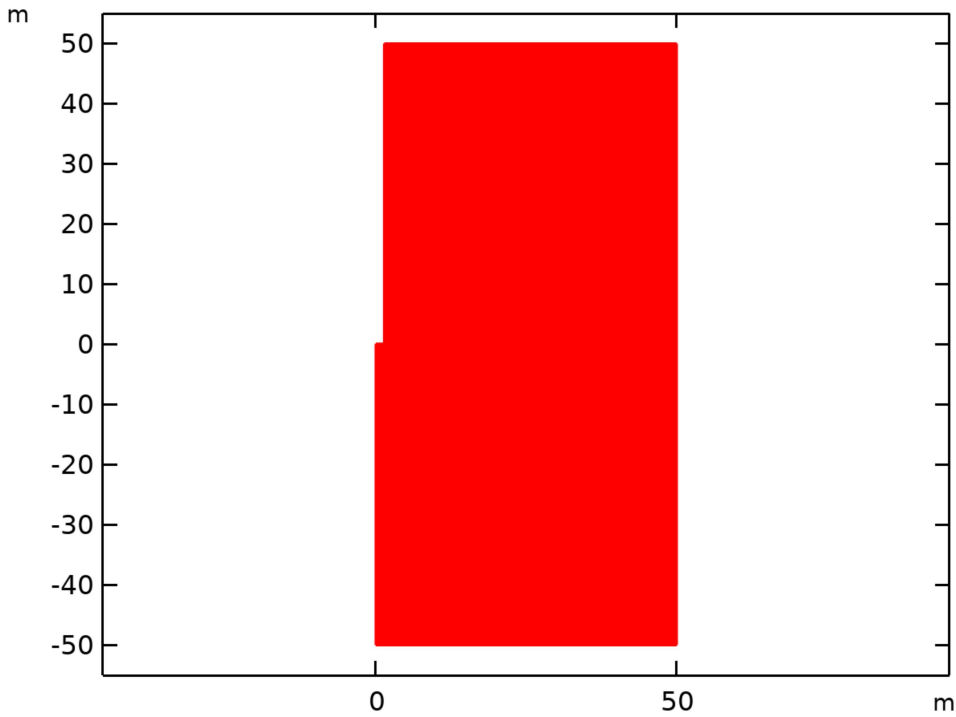

Dataset: Study 1/Solution 1

5.1.2. Revolution 2D

Data

| Description | Value                                     |
|-------------|-------------------------------------------|
| Dataset     | <a href="#">Study 1/Solution 1 (sol1)</a> |

Axis data

| Description       | Value            |
|-------------------|------------------|
| Axis entry method | Two points       |
| Points            | {{0, 0}, {0, 1}} |

Revolution layers

| Description      | Value |
|------------------|-------|
| Start angle      | -90   |
| Revolution angle | 225   |

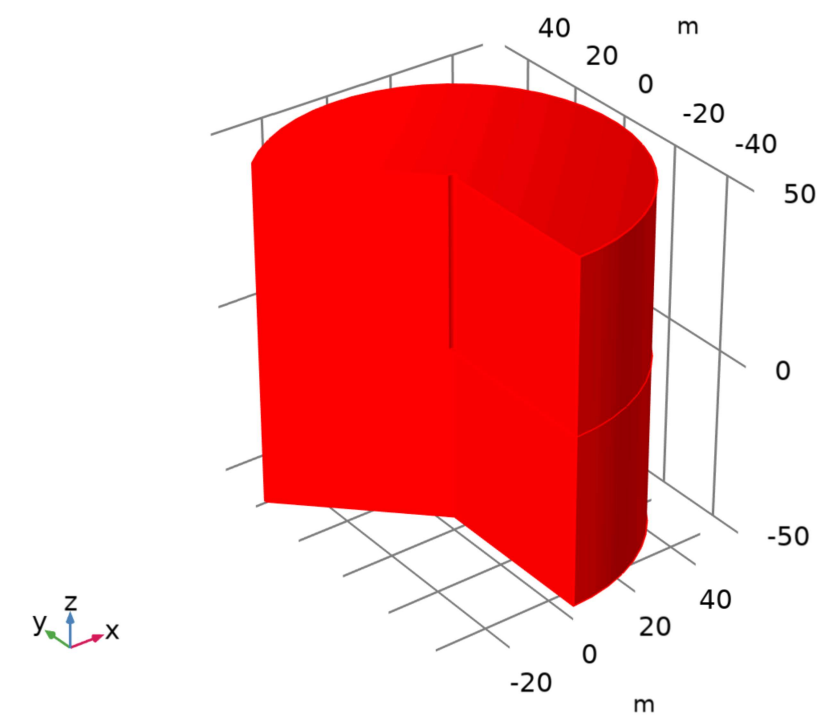

Dataset: Revolution 2D

5.1.3. Probe Solution 2

| Solution    |                       |
|-------------|-----------------------|
| Description | Value                 |
| Solution    | Solution 173 (sol173) |
| Component   | Component 1 (comp1)   |

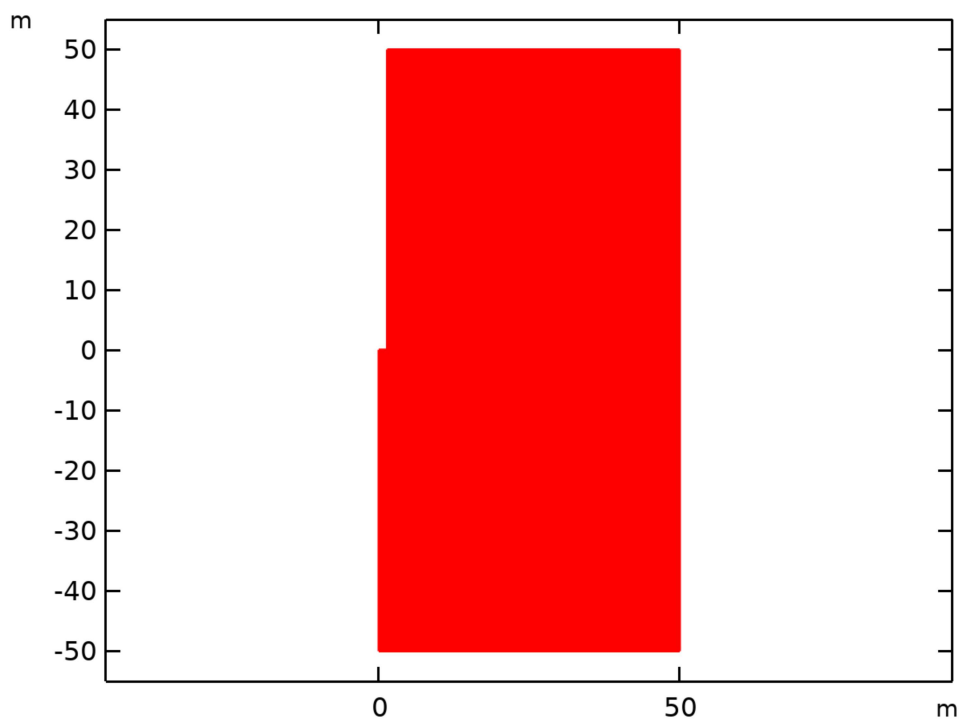

*Dataset: Probe Solution 2*

#### 5.1.4. Boundary Probe 1

##### Selection

|                        |                                         |
|------------------------|-----------------------------------------|
| Geometric entity level | Boundary                                |
| Selection              | Geometry geom1: Dimension 1: Boundary 5 |

##### Data

| Description | Value                                     |
|-------------|-------------------------------------------|
| Dataset     | <a href="#">Probe Solution 2 (sol173)</a> |

##### Settings

| Description       | Value       |
|-------------------|-------------|
| Method            | Integration |
| Integration order | 4           |
| Integration order | On          |

#### 5.1.5. Study 1/Parametric Solutions 1

##### Solution

| Description | Value                         |
|-------------|-------------------------------|
| Solution    | Parametric Solutions 1 (sol2) |
| Component   | Component 1 (comp1)           |

#### 5.1.6. Revolution 2D 2

##### Data

| Description | Value |
|-------------|-------|
|-------------|-------|

|         |                                                       |
|---------|-------------------------------------------------------|
| Dataset | <a href="#">Study 1/Parametric Solutions 1 (sol2)</a> |
|---------|-------------------------------------------------------|

Axis data

| Description       | Value            |
|-------------------|------------------|
| Axis entry method | Two points       |
| Points            | {{0, 0}, {0, 1}} |

Revolution layers

| Description      | Value |
|------------------|-------|
| Start angle      | -90   |
| Revolution angle | 225   |

### 5.1.7. Study 1/Parametric Solutions 2

Solution

| Description | Value                          |
|-------------|--------------------------------|
| Solution    | Parametric Solutions 2 (sol53) |
| Component   | Component 1 (comp1)            |

### 5.1.8. Revolution 2D 3

Data

| Description | Value                                                  |
|-------------|--------------------------------------------------------|
| Dataset     | <a href="#">Study 1/Parametric Solutions 2 (sol53)</a> |

Axis data

| Description       | Value            |
|-------------------|------------------|
| Axis entry method | Two points       |
| Points            | {{0, 0}, {0, 1}} |

Revolution layers

| Description      | Value |
|------------------|-------|
| Start angle      | -90   |
| Revolution angle | 225   |

### 5.1.9. Study 1/Parametric Solutions 3

Solution

| Description | Value                          |
|-------------|--------------------------------|
| Solution    | Parametric Solutions 3 (sol72) |
| Component   | Component 1 (comp1)            |

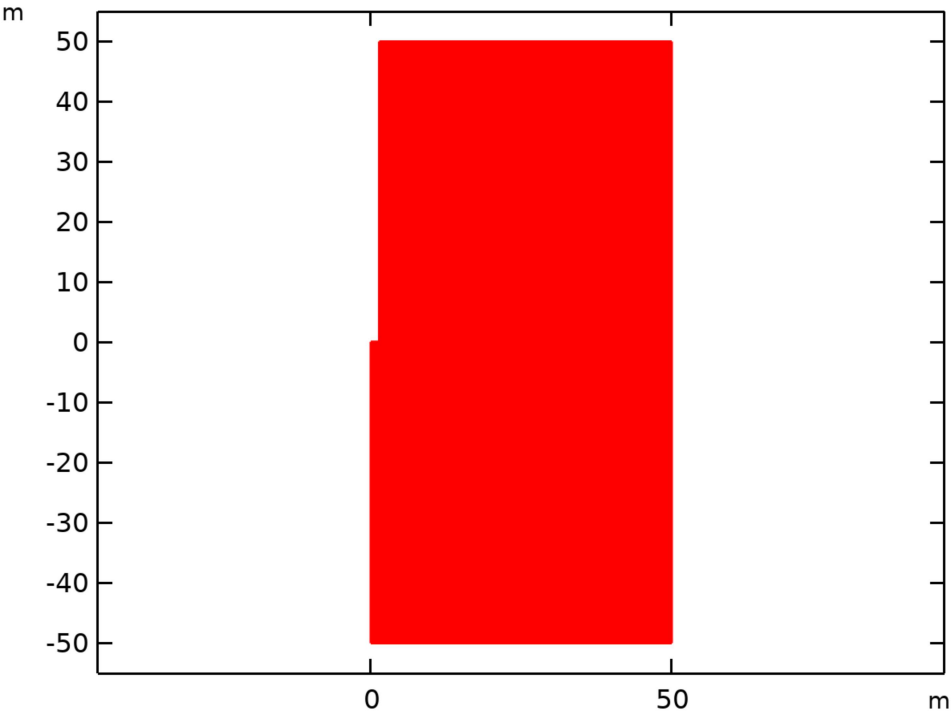

Dataset: Study 1/Parametric Solutions 3

5.1.10. Revolution 2D 4

| Data        |                                                        |
|-------------|--------------------------------------------------------|
| Description | Value                                                  |
| Dataset     | <a href="#">Study 1/Parametric Solutions 3 (sol72)</a> |

| Axis data         |                  |
|-------------------|------------------|
| Description       | Value            |
| Axis entry method | Two points       |
| Points            | {{0, 0}, {0, 1}} |

| Revolution layers |       |
|-------------------|-------|
| Description       | Value |
| Start angle       | -90   |
| Revolution angle  | 225   |

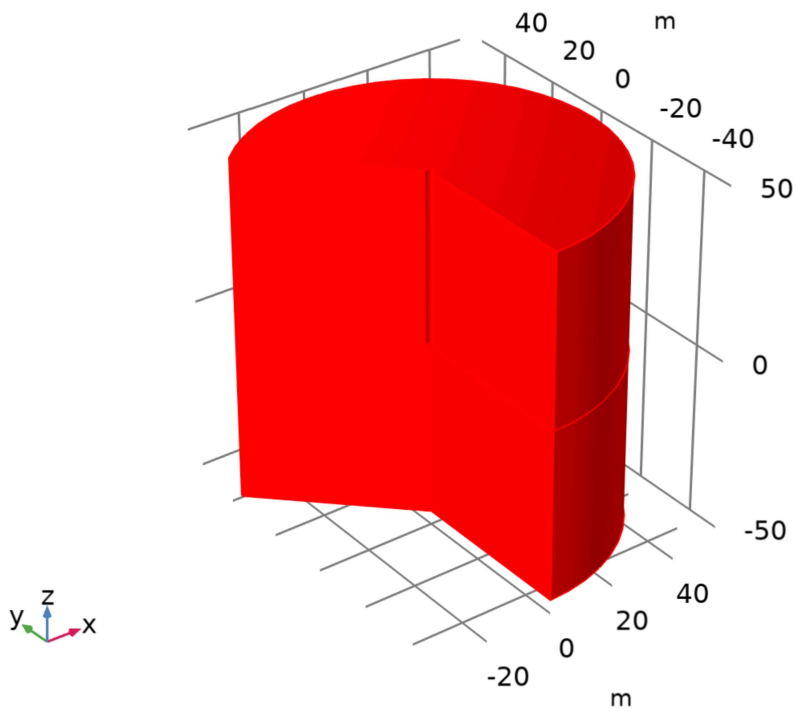

Dataset: Revolution 2D 4

5.1.11. Study 2/Solution 173

| Solution    |                       |
|-------------|-----------------------|
| Description | Value                 |
| Solution    | Solution 173 (sol173) |
| Component   | Component 1 (comp1)   |

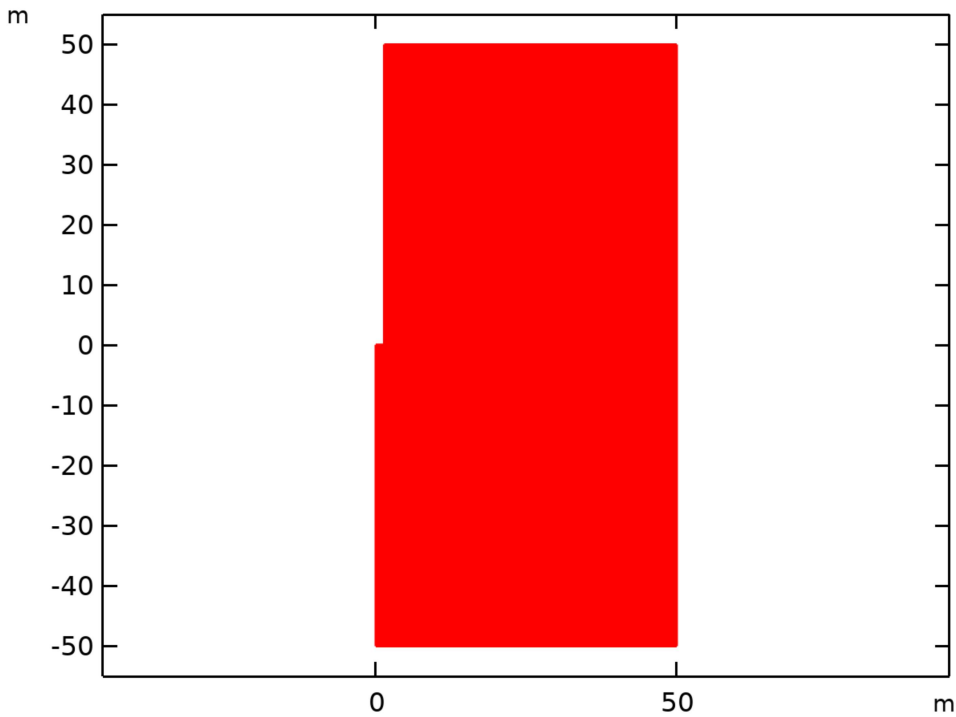

Dataset: Study 2/Solution 173

5.1.12. Revolution 2D 5

Data

| Description | Value                                         |
|-------------|-----------------------------------------------|
| Dataset     | <a href="#">Study 2/Solution 173 (sol173)</a> |

Axis data

| Description       | Value            |
|-------------------|------------------|
| Axis entry method | Two points       |
| Points            | {{0, 0}, {0, 1}} |

Revolution layers

| Description      | Value |
|------------------|-------|
| Start angle      | -90   |
| Revolution angle | 225   |

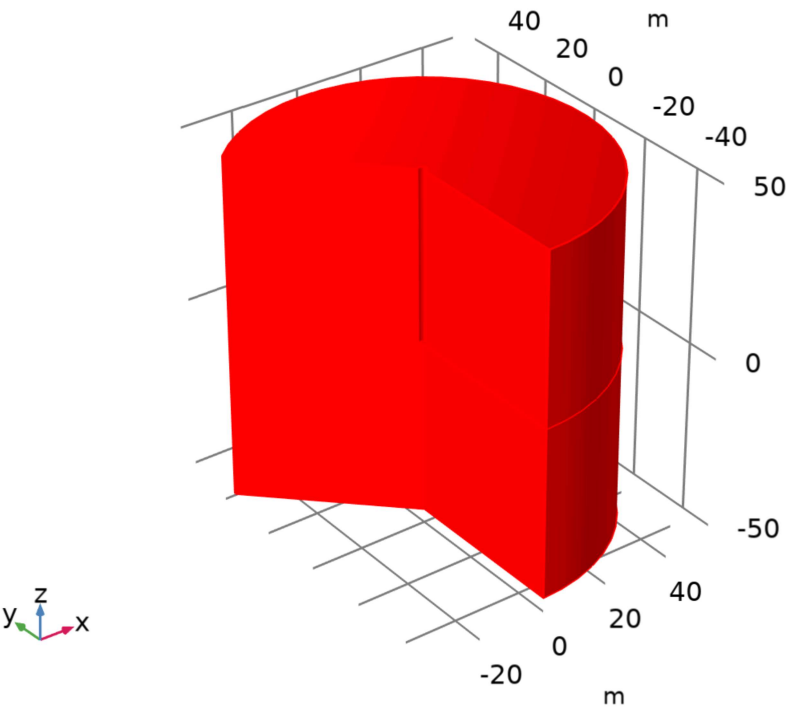

Dataset: Revolution 2D 5

5.2. Derived Values

5.2.1. Boundary Probe 1

Output

|              |                               |
|--------------|-------------------------------|
| Evaluated in | <a href="#">Probe Table 1</a> |
|--------------|-------------------------------|

Data

| Description | Value                            |
|-------------|----------------------------------|
| Dataset     | <a href="#">Boundary Probe 1</a> |

Expressions

| Expression | Unit | Description |
|------------|------|-------------|
|------------|------|-------------|

|                       |       |  |
|-----------------------|-------|--|
| intop1(tds.ndflux_c1) | mol/s |  |
|-----------------------|-------|--|

5.3. Tables

5.3.1. Probe Table 1

| Time (s)  | intop1(tds.ndflux_c1) (mol/s), Boundary Probe 1 |
|-----------|-------------------------------------------------|
| 0         | 412.58                                          |
| 2.1012E-5 | 401.02                                          |
| 2.2024E-5 | 390.04                                          |
| 2.4048E-5 | 369.74                                          |
| 2.8096E-5 | 337.33                                          |
| 3.6192E-5 | 291.84                                          |
| 4.4289E-5 | 262.49                                          |
| 5.2385E-5 | 241.59                                          |
| 6.0481E-5 | 225.46                                          |
| 7.6674E-5 | 200.45                                          |
| 9.2866E-5 | 182.66                                          |
| 1.0906E-4 | 169.22                                          |
| 1.2525E-4 | 158.55                                          |
| 1.5764E-4 | 141.77                                          |
| 1.9002E-4 | 129.58                                          |
| 2.2241E-4 | 120.26                                          |
| 2.5479E-4 | 112.81                                          |
| 3.1956E-4 | 101.08                                          |
| 3.8433E-4 | 92.511                                          |
| 4.491E-4  | 85.941                                          |
| 5.1387E-4 | 80.679                                          |
| 6.4341E-4 | 72.382                                          |
| 7.7295E-4 | 66.318                                          |
| 9.0249E-4 | 61.664                                          |
| 0.001032  | 57.935                                          |
| 0.0011616 | 54.844                                          |
| 0.0014206 | 49.805                                          |
| 0.0016797 | 45.917                                          |
| 0.0019388 | 42.754                                          |
| 0.0021979 | 40.054                                          |
| 0.002716  | 35.416                                          |
| 0.0032342 | 31.564                                          |
| 0.0037524 | 28.256                                          |
| 0.0047887 | 22.767                                          |

|           |        |
|-----------|--------|
| 0.005825  | 18.554 |
| 0.0068613 | 15.323 |
| 0.0078976 | 12.845 |
| 0.0089339 | 10.941 |
| 0.0099703 | 9.4748 |
| 0.011007  | 8.3406 |
| 0.012043  | 7.4594 |
| 0.013079  | 6.771  |
| 0.015152  | 5.7652 |
| 0.017224  | 5.1286 |
| 0.019297  | 4.7207 |
| 0.02137   | 4.4503 |
| 0.023442  | 4.262  |
| 0.025515  | 4.1234 |
| 0.02966   | 3.9171 |
| 0.033806  | 3.7764 |
| 0.042096  | 3.5737 |
| 0.050387  | 3.4419 |
| 0.058677  | 3.3472 |
| 0.066968  | 3.2747 |
| 0.075258  | 3.2174 |
| 0.091839  | 3.1297 |
| 0.10842   | 3.0682 |
| 0.125     | 3.0222 |
| 0.14158   | 2.9852 |
| 0.17474   | 2.9238 |
| 0.20791   | 2.8742 |
| 0.27423   | 2.7912 |
| 0.34056   | 2.7245 |
| 0.4732    | 2.6181 |
| 0.60585   | 2.5402 |
| 0.7385    | 2.4817 |
| 0.87115   | 2.4369 |
| 1.0038    | 2.402  |
| 1.2691    | 2.3502 |
| 1.5344    | 2.3162 |
| 1.7997    | 2.2931 |
| 2.065     | 2.2767 |
| 2.3303    | 2.2645 |
| 2.8609    | 2.2464 |

|        |        |
|--------|--------|
| 3.3915 | 2.2344 |
| 4.3915 | 2.2188 |
| 5.3915 | 2.2091 |
| 6.3915 | 2.2023 |
| 7.3915 | 2.1971 |
| 8.3915 | 2.1929 |
| 9.3915 | 2.1894 |
| 10.391 | 2.1864 |

### 5.3.2. Evaluation 2D

Interactive 2D values

| x       | y        | Value      |
|---------|----------|------------|
| 2.8929  | -0.21973 | 0.93422    |
| 0.33462 | 0.091346 | -0.0086338 |
| 0.34174 | 0.012952 | -0.086873  |
| 0.14762 | 0.68869  | 0.19022    |
| 0.73637 | 0.36524  | 0.92672    |
| 0.48924 | 0.66689  | 0.82101    |
| 0.48924 | 0.67779  | 0.81734    |
| 0.54042 | 1.9754   | 0.024472   |
| 0.84368 | 0.1007   | 1.0062     |
| 0.33573 | 0.46712  | 0.95784    |

## 5.4. Plot Groups

### 5.4.1. Probe Plot Group 1

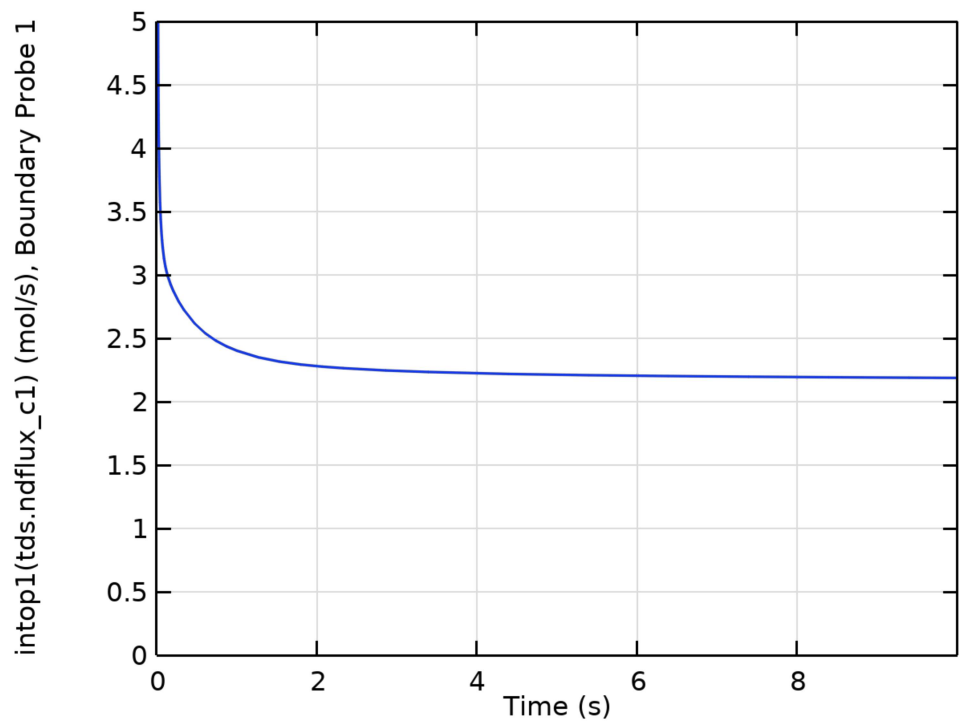

#### 5.4.2. Concentration (tds)

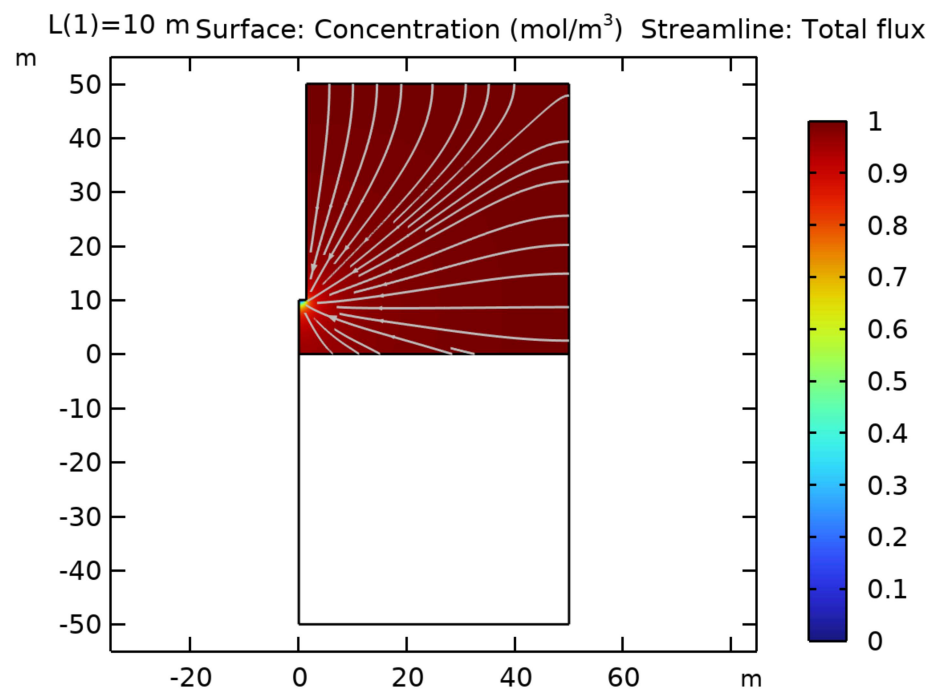

*Surface: Concentration (mol/m<sup>3</sup>) Streamline: Total flux*

#### 5.4.3. Concentration, 3D (tds)

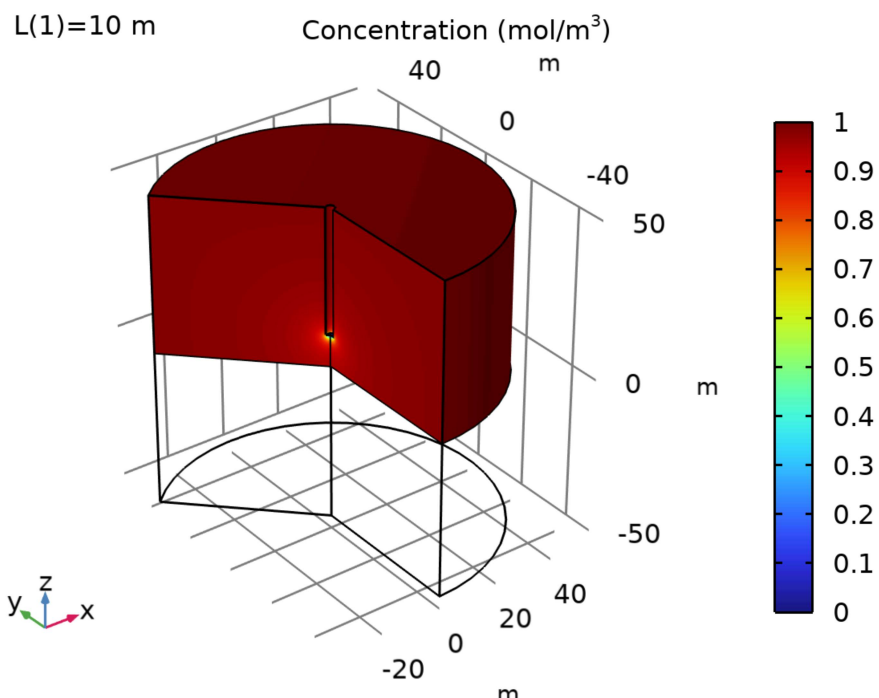

*Concentration ( $\text{mol/m}^3$ )*

#### 5.4.4. Concentration (tds2)

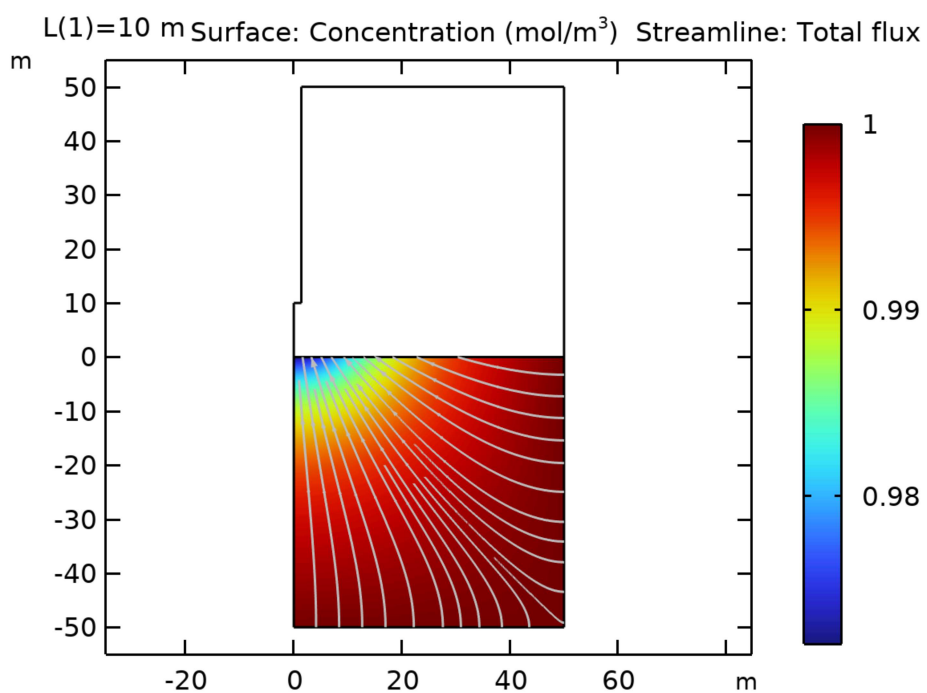

*Surface: Concentration ( $\text{mol/m}^3$ ) Streamline: Total flux*

#### 5.4.5. Concentration, 3D (tds2)

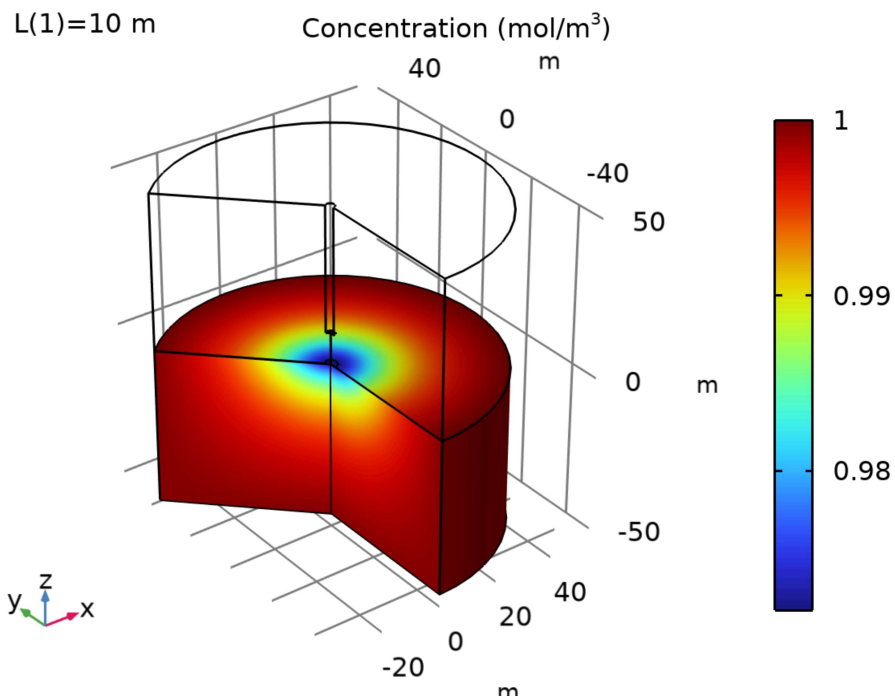

Concentration ( $\text{mol/m}^3$ )

#### 5.4.6. General Form Boundary PDE

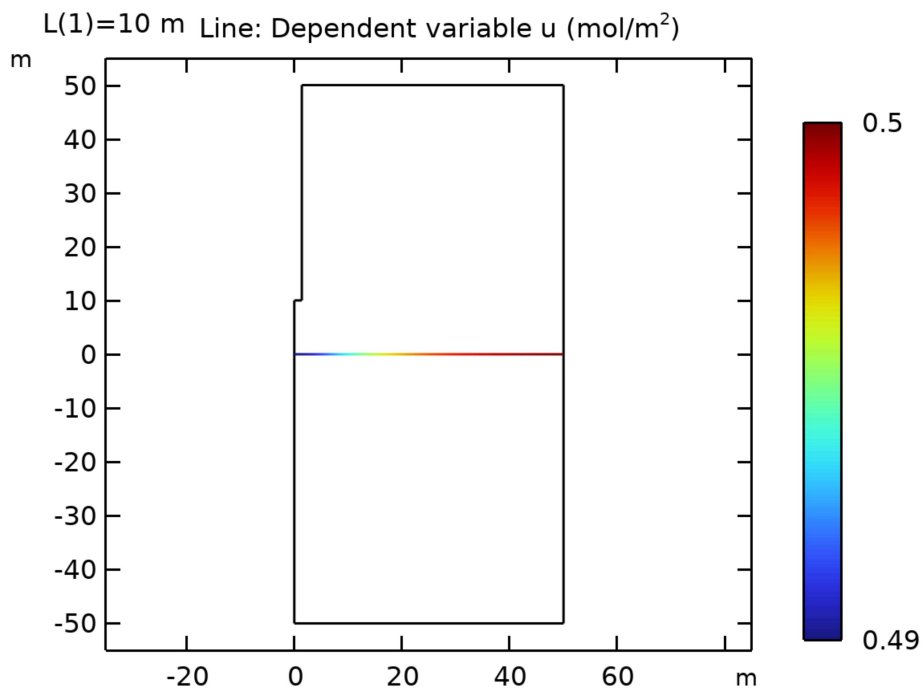

Line: Dependent variable  $u$  ( $\text{mol/m}^2$ )

#### 5.4.7. Concentration (tds) 1

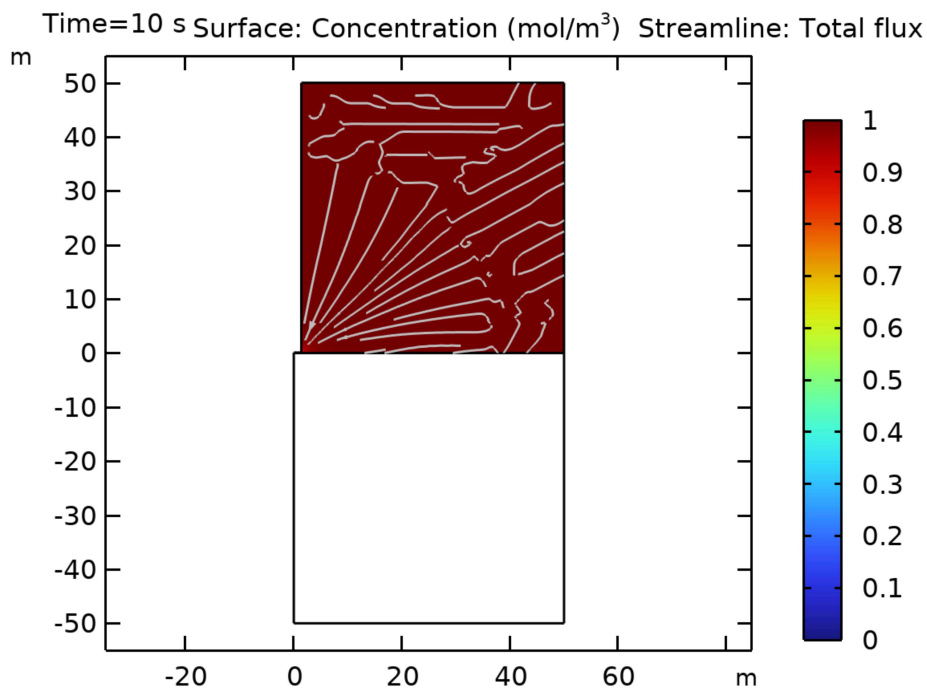

*Surface: Concentration (mol/m<sup>3</sup>) Streamline: Total flux*

#### 5.4.8. Concentration, 3D (tds) 1

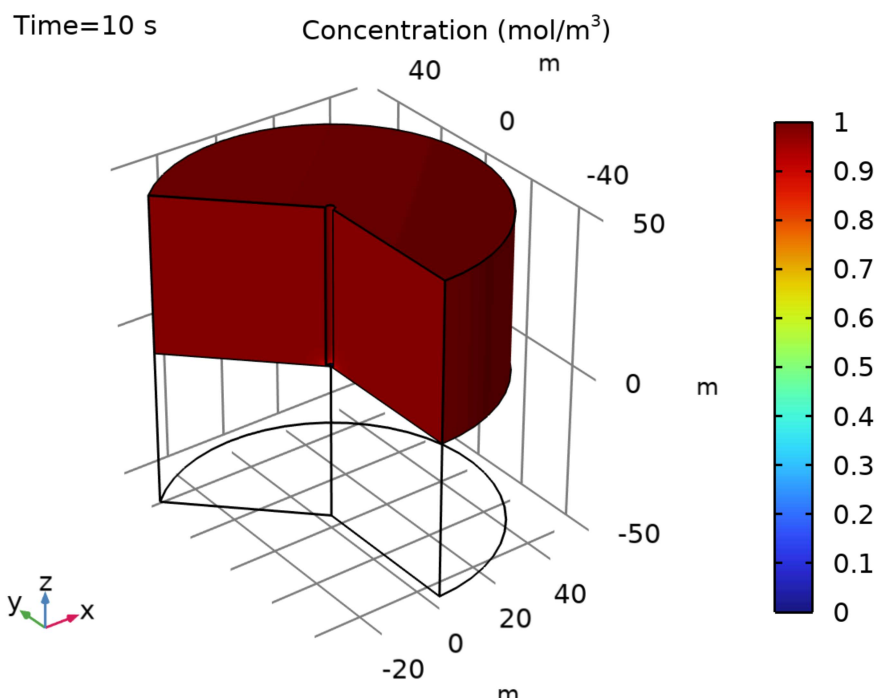

*Concentration (mol/m<sup>3</sup>)*

#### 5.4.9. Concentration (tds2) 1

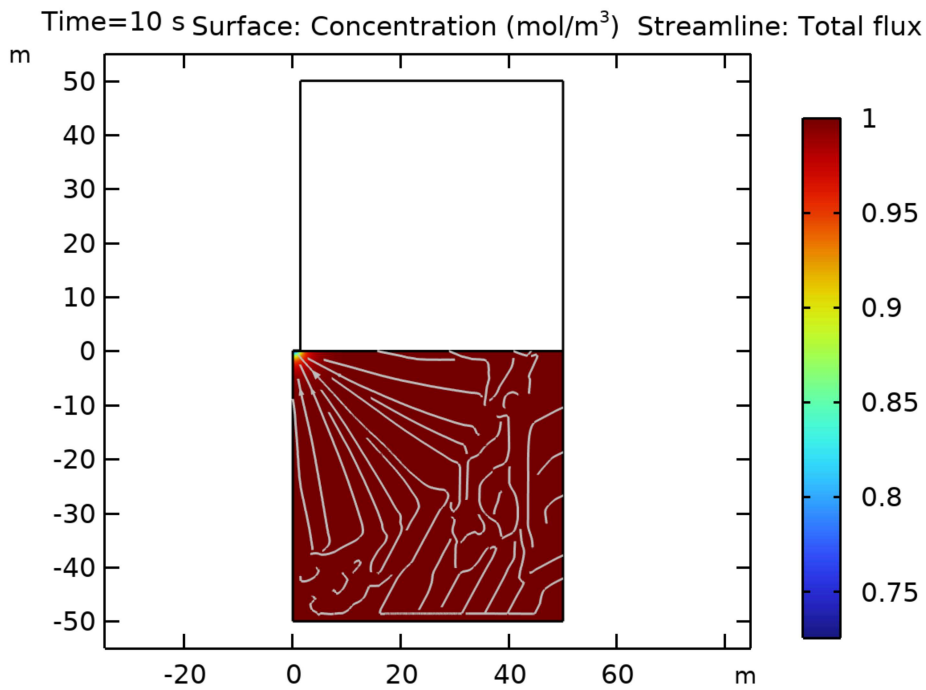

*Surface: Concentration (mol/m<sup>3</sup>) Streamline: Total flux*

#### 5.4.10. Concentration, 3D (tds2) 1

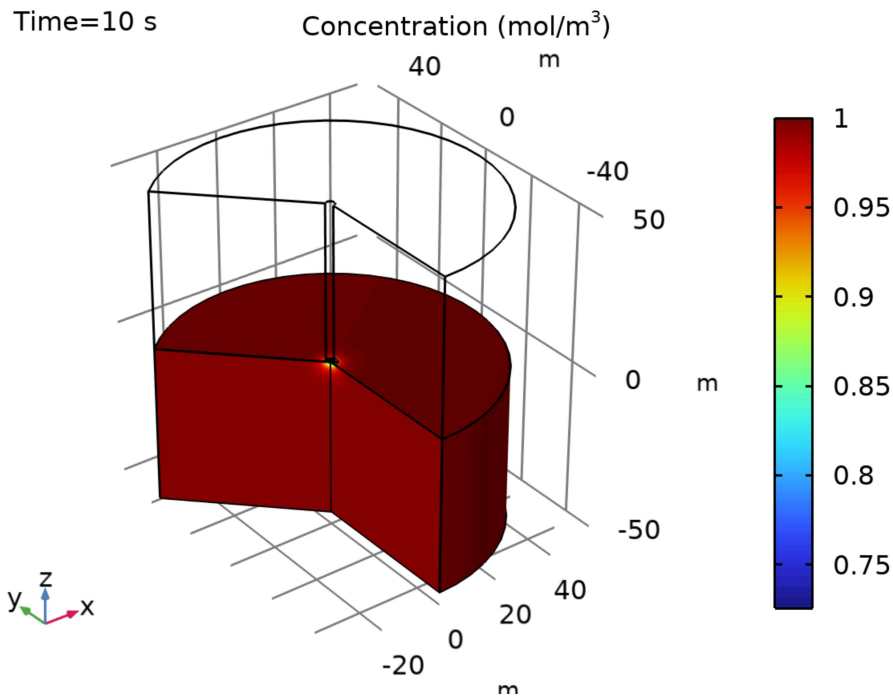

*Concentration (mol/m<sup>3</sup>)*

#### 5.4.11. General Form Boundary PDE 1

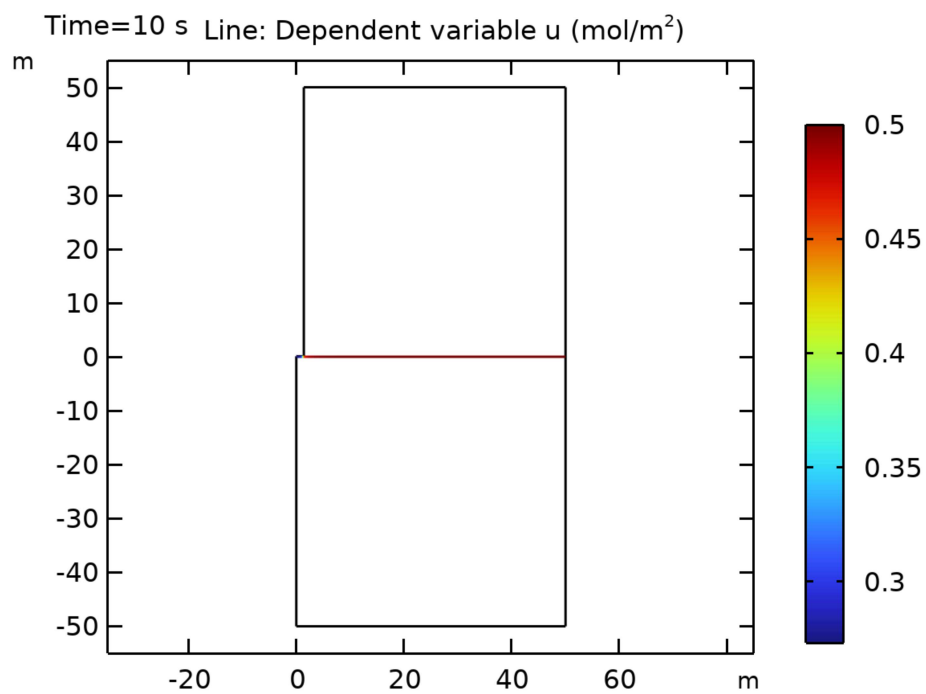

*Line: Dependent variable  $u$  (mol/m<sup>2</sup>)*
